# Supplementary material
Source: publisher figshare collection journal article supplement (https://acs.figshare.com/ndownloader/files/8214026)
Supplement: Supplementary file 1 [file 8214026]

Compound	Smiles	NaV1.7 IC50 (mM)
1	O=S(C1=CC=C(C(C2=C(OC)C=C(C(F)(F)F)C=C2)=NC=N3)C3=C1)(NC4=NC=CS4)=O	0.16
2	O=S(C1=CC=C(C(C2=C(OC)C=C(C(F)(F)F)C=C2)=NC=C3)C3=C1)(NC4=CC=NC=N4)=O	0.73
3	O=S(C1=CC=C(C(C2=C(OC)C=C(C3=CC=CC(F)=C3)C=C2)=NC=C4)C4=C1)(NC5=CC=NC=N5)=O	0.15
4	O=S(C1=CC=C(C(C2=C(OC)C=C(C3=CC=CC(F)=C3)C(Cl)=C2)=NC=C4)C4=C1)(NC5=CC=NC=N5)=O	0.065
5	O=S(C1=CC=C(C(C2=C(OC)C=C(C3=CC=CC(F)=C3)C(Cl)=C2)=NC=C4)C4=C1)(NC5=NC=CC=N5)=O	0.12
6	O=S(C1=CC=C(C(C2=C(OC)C=C(C3=CC=CC(F)=C3)C(Cl)=C2)=NC=C4)C4=C1)(NC5=CC=CN=N5)=O	0.14
7	O=S(C1=CC=C(C(C2=C(OC)C=C(C3=CC=CC(F)=C3)C(Cl)=C2)=NC=C4)C4=C1)(NC5=NC=NS5)=O	0.023
8	O=S(C1=CC=C(C(C2=C(OC)C=C(C3=CC=CC(F)=C3)C(Cl)=C2)=NC=C4)C4=C1)(NC5=NOC=C5)=O	0.049
9	O=S(C1=CC=C(C(C2=C(OC)C=C(C3=CC=CC(F)=C3)C(Cl)=C2)=NC=C4)C4=C1)(NC5=NC=CO5)=O	0.22
10	O=S(C1=CC=C(C(C2=C(OC)C=C(C3=CC=CC(F)=C3)C(Cl)=C2)=NC=C4)C4=C1)(NC5=NOC=N5)=O	0.047
11	O=S(C1=CC=C(C(C2=C(OC)C=C(C3=CC=CC(F)=C3)C(Cl)=C2)=NC=N4)C4=C1)(NC5=NOC=C5)=O	0.037
12	O=S(C1=CC=C(C(C2=C(OC)C=C(C3=CC=CC(F)=C3)C(Cl)=C2)=NN(C)C4=O)C4=C1)(NC5=NOC=C5)=O	0.12
13	O=S(C1=CC(C(C=C1)=C2C3=C(OC)C=C(C4=CC=CC(F)=C4)C(Cl)=C3)=CN(C)C2=O)(NC5=NOC=C5)=O	0.039
14	O=S(C1=CC=C(C(C2=C(OC)C=C(C3=CC=CC(F)=C3)C(Cl)=C2)=C(N)N=N4)C4=C1)(NC5=NOC=C5)=O	0.028
15	O=S(C1=CC=C(C(C2=C(OC)C=C(C3=CC=CC(F)=C3)C(Cl)=C2)=NC=C4O)C4=C1)(NC5=NOC=C5)=O	0.085
16	O=S(C1=CC(C(C=C1)=C2C3=C(OC)C=C(C4=CC=CC(F)=C4)C(Cl)=C3)=CC(N2)=O)(NC5=NOC=C5)=O	0.041
17	O=S(C1=CC=C(C(C2=C(OC)C=C(C3=CC=CC(Cl)=C3)C(F)=C2)=NC=C4)C4=C1)(NC5=NOC=C5)=O	0.037
18	O=S(C1=CC=C(C(C2=C(OC)C=C(C3=CC(F)=CC(F)=C3)C(F)=C2)=NC=C4)C4=C1)(NC5=NOC=C5)=O	0.04
19	O=S(C1=CC=C(C(C2=C(OC)C=C(C3=CC=C(Cl)C(C)=C3)C(F)=C2)=NC=C4)C4=C1)(NC5=NOC=C5)=O	0.06
20	O=S(C1=CC=C(C(C2=C(OC)C=C(C3=CC=CC(C(F)(F)F)=C3)C(F)=C2)=NC=C4)C4=C1)(NC5=NOC=C5)=O	0.036
21	O=S(C1=CC=C(C(C2=C(OC)C=C(C3=CC=C(C(F)(F)F)C=C3)C(F)=C2)=NC=C4)C4=C1)(NC5=NOC=C5)=O	0.24
22	O=S(C1=CC=C(C(C2=C(OC)C=C(C3=CC=CC(C)=C3)C(F)=C2)=NC=C4)C4=C1)(NC5=NOC=C5)=O	0.047
23	O=S(C1=CC=C(C(C2=C(OC)C=C(C3=C(OC)N=CC(F)=C3)C(F)=C2)=NC=C4)C4=C1)(NC5=NOC=C5)=O	0.068
24	O=S(C1=CC=C(C(C2=C(OC)C=C(C3=CC(F)=CC(F)=C3)C=C2)=NC=C4)C4=C1)(NC5=NOC=C5)=O	0.17
25	O=S(C1=CC=C(C(C2=C(OC)C=C(C3=CC=CC(C(F)(F)F)=C3)C=C2)=NC=C4)C4=C1)(NC5=NOC=C5)=O	0.061
26	O=S(C1=CC=C(C(C2=C(OC)C=C(C3=CC(F)=CC(F)=C3)C(C#N)=C2)=NC=C4)C4=C1)(NC5=NOC=C5)=O	0.14
27	O=S(C1=CC=C(C(C2=C(OC)C=C(C3=CC=CC(C(F)(F)F)=C3)C(C#N)=C2)=NC=C4)C4=C1)(NC5=NOC=C5)=O	0.028
